# Supplementary material for: HealthCall for the smartphone: technology enhancement of brief intervention in HIV alcohol dependent patients
Source: Springer Nature journal article supplement (doi:10.1186/1940-0640-9-5), 2014-02-17
Supplement: 13722_2013_237_MOESM2_ESM.pdf [file 13722_2013_237_MOESM2_ESM.pdf]

N = 96

Referred by clinic staff to study staff for pre-screening

N = 56<sup>b</sup>

Pre-screened and found to be eligible for full screening: positive for  $\geq 4$  drinks,  $\geq 1$  day, past 30 days and current DSM-IV alcohol dependence (rated by counselor on checklist)

N = 41<sup>c</sup>

Fully screened (N=41 given available time and resources), found to be eligible for enrollment, enrolled in study.

Excluded after enrollment

Withdrew consent (N=1)

Withdrawn due to medical condition (N=1)

N = 37

Provided 60-day data (2 lost to follow-up)

N = 36

Offered an additional 30 days of participation (one patient planning to leave NYC at 60 days not offered continuation)

N=23

Wished to continue and provided 90-day data
